# Supplementary material for: Phylogenomic analysis of 589 metagenome-assembled genomes encompassing all major prokaryotic lineages from the gut of higher termites
Source: PeerJ. 2020 Feb 13;8:e8614. doi: 10.7717/peerj.8614 (PMC7024585; doi:10.7717/peerj.8614)
Supplement: Supplemental Information 17 [file peerj-08-8614-s017.xlsx]

## Sheet: Sheet1
Supplementary Table S1: Metagenome characteristics.
IMG_ID	SRA_accession	Sample	Host	Diet	Dataset	Bases	Bases_assembled	Bins	High_quality_MAGs	Medium_quality_MAGs	MAGs_total
3300002552	SAMN03344592	Co191P1	Cornitermes sp.	litter feeder	Rossmassler et al, 2015	4527824298	1534458334	94	2	30	32
3300002450	SAMN03344593	Co191P3	Cornitermes sp.	litter feeder	Rossmassler et al, 2015	5206507615	1316108521	76	3	19	22
3300002834	SAMN03344594	Co191P4	Cornitermes sp.	litter feeder	Rossmassler et al, 2015	7246612692	1303050472	22	1	6	7
3300001474	SAMN03344595	Cu122C	Cubitermes ugandensis	soil feeder	Rossmassler et al, 2015	2084953052	110766665	0	0	0	0
3300001468	SAMN03344596	Cu122M	Cubitermes ugandensis	soil feeder	Rossmassler et al, 2015	1785800126	108362200	0	0	0	0
3300002185	SAMN03344597	Cu122P1	Cubitermes ugandensis	soil feeder	Rossmassler et al, 2015	12533720155	2060091016	24	2	3	5
3300002127	SAMN03344598	Cu122P3	Cubitermes ugandensis	soil feeder	Rossmassler et al, 2015	10350201443	1121610311	18	2	3	5
3300002125	SAMN03344599	Cu122P4	Cubitermes ugandensis	soil feeder	Rossmassler et al, 2015	7719295363	1294769701	14	0	3	3
3300002175	SAMN03344600	Cu122P5	Cubitermes ugandensis	soil feeder	Rossmassler et al, 2015	3212382606	1992244563	52	2	16	18
3300009826	SAMN13139693	Emb289P1	Embiratermes neotenicus	humus feeder	Current study	6730298123	4118462945	136	9	36	45
3300010049	SAMN13139694	Emb289P3	Embiratermes neotenicus	humus feeder	Current study	9855509023	5107989241	162	15	37	52
3300009784	SAMN13139695	Emb289P4	Embiratermes neotenicus	humus feeder	Current study	2908939749	2182300635	82	11	10	21
3300010162	SAMN13139696	Lab288P1	Labiotermes labralis	soil feeder	Current study	4884495598	3054717051	143	18	48	66
3300010167	SAMN13139697	Lab288P3	Labiotermes labralis	soil feeder	Current study	8721553928	5684246554	234	15	57	72
3300010882	SAMN13139698	Lab288P4	Labiotermes labralis	soil feeder	Current study	2383726555	2383726555	104	7	24	31
3300002507	SAMN03344601	Mp193P1	Microcerotermes parvus	wood feeder	Rossmassler et al, 2015	2560189264	1475972723	10	0	1	1
3300002449	SAMN03344602	Mp193P3	Microcerotermes parvus	wood feeder	Rossmassler et al, 2015	2847282076	712348561	44	0	1	1
3300002509	SAMN03344603	Mp193P4	Microcerotermes parvus	wood feeder	Rossmassler et al, 2015	2889101660	1490046774	19	3	1	4
3300001542	SAMN03344604	Nc150C	Nasutitermes corniger	wood feeder	Rossmassler et al, 2015	2160702157	338005394	0	0	0	0
3300001466	SAMN03344605	Nc150M	Nasutitermes corniger	wood feeder	Rossmassler et al, 2015	1707010736	129224034	1	0	1	1
3300002238	SAMN03344606	Nc150P1	Nasutitermes corniger	wood feeder	Rossmassler et al, 2015	1758523850	1425473702	10	1	2	3
3300002119	SAMN03344607	Nc150P3	Nasutitermes corniger	wood feeder	Rossmassler et al, 2015	3098210377	634519147	41	1	5	6
3300002308	SAMN03344608	Nc150P4	Nasutitermes corniger	wood feeder	Rossmassler et al, 2015	3913977135	1643542793	26	3	6	9
3300001343	SAMN03344609	Nc150P5	Nasutitermes corniger	wood feeder	Rossmassler et al, 2015	2304801561	360689695	2	0	1	1
3300002501	SAMN03344610	Nt197P1	Neocapritermes taracua	humus feeder	Rossmassler et al, 2015	5221599252	1529527804	19	1	5	6
3300006045	SAMN03344611	Nt197P3	Neocapritermes taracua	humus feeder	Rossmassler et al, 2015	3193530320	3193530320	143	16	54	70
3300002504	SAMN03344612	Nt197P4	Neocapritermes taracua	humus feeder	Rossmassler et al, 2015	6220709880	1536697946	33	2	9	11
3300002508	SAMN03344613	Th196P1	Termes hospes	humus feeder	Rossmassler et al, 2015	2218043451	1511161985	11	0	6	6
3300006226	SAMN03344614	Th196P3	Termes hospes	humus feeder	Rossmassler et al, 2015	3211497060	3211497060	152	18	46	64
3300002462	SAMN03344615	Th196P4	Termes hospes	humus feeder	Rossmassler et al, 2015	5586009400	1799722629	60	3	24	27
