# Supplementary material for: Phylogenomic analysis of 589 metagenome-assembled genomes encompassing all major prokaryotic lineages from the gut of higher termites
Source: PeerJ. 2020 Feb 13;8:e8614. doi: 10.7717/peerj.8614 (PMC7024585; doi:10.7717/peerj.8614)
Supplement: Supplemental Information 20 [file peerj-08-8614-s020.xlsx]

## Sheet: Table S4
Table S4 | Representation of the MAGs among the bacterial gut microbiota of higher termites at different taxonomic ranks. The interactive spreadsheet allows to group/ungroup each taxon down to the genus level. Taxa shown in green comprise MAGs assigned by phylogenetic placement of their 16S rRNA gene sequences. Taxa shown in red contain only MAGs without 16S rRNA genes; their placement is based o…
						MAGs					16S rRNA amplicon libraries (rel. abundance, %)
						Total	with		Relative		Core	Average		Wood/grass-feed.			Litter-feed.		Humus-feeding			Soil-feeding			Fungus-feeding
Domain	Phylum	Class	Order	Family	Genus	number	16S gene		abund. (%)					Mc	Nc	Trx	Co	Vex	Atx	Nt	Th	Alt	Cu	Opx	Odx	Max	Mas
	Acidobacteria	Acidobacteriia	Acidobacteriales	Acidobacteriaceae	M1PT4-70 termite group	1	0				0.642857	0.269378		0.304136	0.729927	0	0.121655	0.304136	0	0.547445	0.729927	0.729927	0.182482	0	0.121655	0	0
				Acidobacteriaceae		1	0				0.785714	0.360619		0.304136	0.790754	0	0.243309	0.486618	0.0608273	0.608273	0.729927	0.851582	0.182482	0.121655	0.364964	0	0.304136
			Acidobacteriales			1	0				0.785714	0.360619		0.304136	0.790754	0	0.243309	0.486618	0.0608273	0.608273	0.729927	0.851582	0.182482	0.121655	0.364964	0	0.304136
	Acidobacteria	Acidobacteriia	unclassified			1	0				0.0714286	0.0304136		0	0	0	0.0608273	0.182482	0.0608273	0.0608273	0	0.0608273	0	0	0	0	0
		Acidobacteriia				2	0		0.156368		0.785714	0.360619		0.304136	0.790754	0	0.243309	0.486618	0.0608273	0.608273	0.729927	0.851582	0.182482	0.121655	0.364964	0	0.304136
	Acidobacteria	Holophagae	Holophagales	Holophagaceae	M1PL1-36 termite group	2	2				0.428571	0.11731		0.364964	0.121655	0.425791	0	0	0.0608273	0.364964	0.121655	0.121655	0	0	0.0608273	0	0
				Holophagaceae		2	2				0.428571	0.147723		0.364964	0.121655	0.425791	0	0	0.0608273	0.790754	0.121655	0.121655	0	0	0.0608273	0	0
			Holophagales			2	2				0.428571	0.147723		0.364964	0.121655	0.425791	0	0	0.0608273	0.790754	0.121655	0.121655	0	0	0.0608273	0	0
		Holophagae				2	2		0.196394		0.428571	0.147723		0.364964	0.121655	0.425791	0	0	0.0608273	0.790754	0.121655	0.121655	0	0	0.0608273	0	0
	Acidobacteria					4	2		0.352762		0.928571	0.508342		0.6691	0.912409	0.425791	0.243309	0.486618	0.121655	1.39903	0.851582	0.973236	0.182482	0.121655	0.425791	0	0.304136
	Actinobacteria	Acidimicrobiia	Acidimicrobiales	Acidimicrobiaceae	unclassified	1	0				0.142857	0.0391032		0	0	0	0	0	0	0	0	0.121655	0	0.364964	0	0	0.0608273
				Acidimicrobiaceae		1	0				0.142857	0.0391032		0	0	0	0	0	0	0	0	0.121655	0	0.364964	0	0	0.0608273
			Acidimicrobiales			1	0				0.142857	0.0391032		0	0	0	0	0	0	0	0	0.121655	0	0.364964	0	0	0.0608273
		Acidimicrobiia				1	0		0.12017		0.142857	0.0391032		0	0	0	0	0	0	0	0	0.121655	0	0.364964	0	0	0.0608273
			Actinomycetales			–	–				0.5	0.134689		0.0608273	0.0608273	0	0	0.121655	0.0608273	0.243309	0.0608273	0.182482	0.304136	0.182482	0.182482	0	0.425791
	Actinobacteria	Actinobacteria	Frankiales	Acidothermaceae	Acidothermus	–	–				0.357143	0.125999		0	0	0	0	0.121655	0.182482	0.0608273	0	0.243309	0.243309	0.912409	0	0	0
				Acidothermaceae		–	–				0.357143	0.125999		0	0	0	0	0.121655	0.182482	0.0608273	0	0.243309	0.243309	0.912409	0	0	0
	Actinobacteria	Actinobacteria	Frankiales	Frankiaceae	Jatrophihabitans	1	1				0.0714286	0.021724		0	0	0	0	0	0	0	0	0.0608273	0	0.243309	0	0	0
				Frankiaceae		1	1				0.0714286	0.021724		0	0	0	0	0	0	0	0	0.0608273	0	0.243309	0	0	0
			Frankiales			1	1				0.357143	0.173792		0	0	0	0	0.121655	0.182482	0.0608273	0	0.6691	0.243309	1.15572	0	0	0
			Corynebacteriales			1	0					0.043448		0	0	0.0608273	0	0	0	0	0	0.182482	0.0608273	0.0608273	0.0608273	0	0.182482
	Actinobacteria	Actinobacteria	Micrococcales_3	Cellulomonadaceae	Cellulomonas	7	1				0	0.0043448		0	0	0	0	0	0	0	0	0	0	0.0608273	0	0	0
				Cellulomonadaceae		7	1				0.0714286	0.0130344		0	0	0	0	0	0	0	0	0	0	0.0608273	0.121655	0	0
	Actinobacteria	Actinobacteria	Micrococcales_3	Microbacteriaceae	Gryllotalpicola	2	0				0	0.0043448		0	0	0	0	0	0	0.0608273	0	0	0	0	0	0	0
				Microbacteriaceae		2	0				0.142857	0.021724		0	0	0	0	0	0	0.121655	0	0	0	0	0	0	0.182482
	Actinobacteria	Actinobacteria	Micrococcales_2	Promicromonosporaceae	Cellulosimicrobium	3	1				0.428571	0.0999305		0	0	0.243309	0	0.121655	0.0608273	0.425791	0.121655	0.121655	0.243309	0.0608273	0	0	0
				Promicromonosporaceae		3	1				0.428571	0.10862		0	0	0.304136	0.0608273	0.121655	0.0608273	0.425791	0.121655	0.121655	0.243309	0.0608273	0	0	0
	Actinobacteria	Actinobacteria	Micrococcales_1	Sanguibacteraceae	Paraoerskovia	4	1				0.571429	0.404067		1.88564	0.243309	1.21655	0	0.547445	0.6691	0.304136	0	0.121655	0.0608273	0	0.608273	0	0
				Sanguibacteraceae		4	1				0.571429	0.404067		1.88564	0.243309	1.21655	0	0.547445	0.6691	0.304136	0	0.121655	0.0608273	0	0.608273	0	0
			Micrococcales			16	3				0.857143	0.582204		1.94647	0.304136	1.52068	0.0608273	0.6691	0.729927	0.851582	0.121655	0.243309	0.304136	0.121655	0.973236	0	0.304136
	Actinobacteria	Actinobacteria	Propionibacteriales	Nocardioidaceae	Nocardioides	2	0				0.0714286	0.0651721		0	0	0	0.0608273	0	0	0	0	0.0608273	0	0.0608273	0.6691	0	0.0608273
				Nocardioidaceae		2	0				0.214286	0.0912409		0	0	0	0.0608273	0	0	0	0	0.121655	0	0.0608273	0.790754	0	0.243309
	Actinobacteria	Actinobacteria	Propionibacteriales	Propionibacteriaceae	Aestuariimicrobium	12	6				0	0.00868961		0	0	0	0.0608273	0	0	0	0	0	0	0.0608273	0	0	0
				Propionibacteriaceae		12	6				0	0.00868961		0	0	0	0.0608273	0	0	0	0	0	0	0.0608273	0	0	0
			Propionibacteriales			14	6				0.357143	0.0999305		0	0	0	0.121655	0	0	0	0	0.121655	0	0.121655	0.790754	0	0.243309
	Actinobacteria	Actinobacteriia	unclassified			3	0				0.642857	0.32586		0.547445	0.0608273	0.486618	0.0608273	0.486618	0.182482	0.182482	0.0608273	0.182482	0.243309	0	0.608273	0	1.45985
		Actinobacteriia				35	10		2.07996		0.928571	1.64668		2.55474	0.547445	2.18978	0.243309	1.45985	1.39903	1.45985	0.304136	3.10219	1.3382	2.25061	3.10219	0	3.10219
	Actinobacteria	Coriobacteriia	Coriobacteriales	Coriobacteriales incertae sedis	Raoultibacter	16	9				1	0.77772		0.182482	0.425791	0.182482	0.6691	0.547445	0.6691	1.09489	0.608273	0.364964	0.973236	0.425791	0.425791	1.64234	2.6764
				Coriobacteriales incertae sedis		16	9				1	0.77772		0.182482	0.425791	0.182482	0.6691	0.547445	0.6691	1.09489	0.608273	0.364964	0.973236	0.425791	0.425791	1.64234	2.6764
	Actinobacteria	Coriobacteriia	Coriobacteriales	OPB41	Rs-J10 group	16	2				0.571429	0.356274		0	0	0	0.121655	0.121655	0.121655	0.0608273	0.182482	0.364964	0.729927	3.10219	0.182482	0	0
				OPB41		16	2				0.571429	0.356274		0	0	0	0.121655	0.121655	0.121655	0.0608273	0.182482	0.364964	0.729927	3.10219	0.182482	0	0
	Actinobacteria	Coriobacteriia	Coriobacteriales	unclassified		1	1				0.357143	0.0868961		0.0608273	0	0	0.304136	0.0608273	0	0.243309	0.121655	0.121655	0.0608273	0	0.0608273	0.0608273	0.121655
			Coriobacteriales			33	12				1	1.26434		0.243309	0.425791	0.182482	1.15572	0.790754	0.851582	1.39903	0.973236	0.851582	2.06813	3.52798	0.6691	1.76399	2.79805
		Coriobacteriia				33	12		0.6417		1	1.26434		0.243309	0.425791	0.182482	1.15572	0.790754	0.851582	1.39903	0.973236	0.851582	2.06813	3.52798	0.6691	1.76399	2.79805
	Actinobacteria	Thermoleophilia	Solirubrobacterales	unclassified		2	0				0.214286	0.139034		0	0	0	0	0	0	0	0	0.425791	0.182482	1.21655	0.0608273	0	0.0608273
			Solirubrobacterales			2	0				0.214286	0.139034		0	0	0	0	0	0	0	0	0.425791	0.182482	1.21655	0.0608273	0	0.0608273
		Thermoleophilia				2	0		0.0887265		0.214286	0.139034		0	0	0	0	0	0	0	0	0.425791	0.182482	1.21655	0.0608273	0	0.0608273
	Actinobacteria					71	22		3.01342		1	3.08916		2.79805	0.973236	2.37226	1.39903	2.25061	2.25061	2.85888	1.27737	4.50122	3.58881	7.3601	3.83212	1.76399	6.0219
	Bacteroidetes	Bacteroidia	Bacteroidales	Dysgonomonadaceae	Dysgonomonas	–	–				0.285714	0.56048		0.0608273	0.0608273	1.3382	0.0608273	0.0608273	0	0	0.547445	0.0608273	0	0	5.3528	0.0608273	0.243309
				Dysgonomonadaceae		–	–				0.285714	0.56048		0.0608273	0.0608273	1.3382	0.0608273	0.0608273	0	0	0.547445	0.0608273	0	0	5.3528	0.0608273	0.243309
	Bacteroidetes	Bacteroidia	Bacteroidales	Marinilabiliaceae	Termite group	1	1				0.5	0.160758		0	0.121655	0.121655	0.0608273	0.851582	0.121655	0.0608273	0	0	0.0608273	0	0.121655	0.364964	0.364964
				Marinilabiliaceae		1	1				0.5	0.160758		0	0.121655	0.121655	0.0608273	0.851582	0.121655	0.0608273	0	0	0.0608273	0	0.121655	0.364964	0.364964
	Bacteroidetes	Bacteroidia	Bacteroidales	Paludibacteraceae	Paludibacter	2	0				0.5	0		0	0	0.0608273	0.182482	0.912409	0.304136	0.425791	0.182482	0.0608273	0.304136	0.851582	0.0608273	0	0
	Bacteroidetes	Bacteroidia	Bacteroidales	Paludibacteraceae	Ps171-103 termite group	–	–				0.785714	0.495308		0.0608273	0.121655	0.243309	0.547445	0.851582	0.486618	1.21655	0.790754	0.6691	0.243309	0.0608273	0.608273	1.03406	0
				Paludibacteraceae		2	0				0.857143	0.838547		0.0608273	0.121655	0.304136	0.851582	2.0073	0.973236	1.88564	1.15572	0.729927	0.6691	0.973236	0.608273	1.39903	0
					unclassified	1	0				0.428571	0.182482		0	0	0	0.0608273	0.425791	0.729927	0.304136	0.486618	0.364964	0	0.121655	0.0608273	0	0
				Prolixibacteraceae		1	0				0.428571	0.182482		0	0	0	0.0608273	0.425791	0.729927	0.304136	0.486618	0.364964	0	0.121655	0.0608273	0	0
	Bacteroidetes	Bacteroidia	Bacteroidales	SRRT63	Termite group	–	–				1	1.37296		0.182482	0.608273	1.27737	0.973236	2.37226	1.70316	3.22384	2.37226	2.61557	1.45985	0.486618	1.09489	0.121655	0.729927
				SRRT63		–	–				1	1.37296		0.182482	0.608273	1.27737	0.973236	2.37226	1.70316	3.22384	2.37226	2.61557	1.45985	0.486618	1.09489	0.121655	0.729927
	Bacteroidetes	Bacteroidia	Bacteroidales	Tannerellaceae	Tannerella	–	–				0.785714	1.38599		0.0608273	0	1.15572	1.70316	4.62287	2.49392	2.12895	3.10219	2.25061	0.121655	0.121655	1.45985	0	0.182482
				Tannerellaceae		–	–				0.928571	1.51634		0.243309	0	1.15572	2.18978	4.92701	2.61557	2.12895	3.16302	2.31144	0.121655	0.121655	1.76399	0.182482	0.304136
	Bacteroidetes	Bacteroidia	Bacteroidales	Cluster V	Candidatus Armantifilum	4	0				0.714286	2.05509		0.0608273	0.304136	2.12895	7.66423	2.91971	3.71046	2.55474	0.547445	5.77859	1.15572	1.82482	0.0608273	0.0608273	0
	Bacteroidetes	Bacteroidia	Bacteroidales	Cluster V	Cockroach group	–	–				0.785714	0.890685		0	0	0.121655	2.0073	1.39903	2.25061	1.52068	0.912409	0.608273	0.182482	0.912409	0.0608273	2.31144	0.182482
				Cluster V		4	0				0.928571	3.39329		0.0608273	0.486618	2.25061	10.3406	4.56204	6.14355	5.23114	1.76399	6.75182	1.76399	3.04136	0.425791	4.37956	0.304136
	Bacteroidetes	Bacteroidia	Bacteroidales	Rikenellaceae	M2PB4-65 termite group	–	–				0.857143	0.686479		0	0.364964	1.58151	1.58151	0.790754	1.45985	0.790754	0.486618	0.486618	1.03406	0	0.243309	0.486618	0.304136
	Bacteroidetes	Bacteroidia	Bacteroidales	Rikenellaceae	COB-P4-1 termite group	–	–				0.714286	0.364964		0.182482	0.364964	0.912409	1.09489	0.729927	0.364964	0.182482	0.304136	0.6691	0.121655	0	0.0608273	0.0608273	0.0608273
	Bacteroidetes	Bacteroidia	Bacteroidales	Rikenellaceae	Rs-E47 termite group	5	1				0.785714	0.386688		0.0608273	0.425791	0.243309	0.790754	0.121655	0.304136	0.121655	0.790754	0.243309	0.243309	0.0608273	0.912409	1.09489	0
	Bacteroidetes	Bacteroidia	Bacteroidales	Rikenellaceae	vadinHA21	2	1				0.428571	0.377998		0	0.0608273	0	0.364964	0.790754	1.03406	2.06813	0.486618	0.0608273	0.0608273	0.0608273	0	0.0608273	0.243309
	Bacteroidetes	Bacteroidia	Bacteroidales	Rikenellaceae	unclassified	2	0				0.357143	0.112965		0	0.0608273	0	0.0608273	0.0608273	0.0608273	0.304136	0.243309	0.0608273	0.0608273	0	0.182482	0.243309	0.243309
				Rikenellaceae		7	2				1	1.84654		0.243309	1.21655	2.73723	3.95377	2.43309	3.16302	3.16302	2.06813	1.52068	1.45985	0.121655	1.21655	1.82482	0.729927
	Bacteroidetes	Bacteroidia	Bacteroidales	RC9 gut group	M2PB4-61 termite group	6	2				0.785714	0.503997		0.547445	0.608273	1.58151	0.608273	0.608273	0.547445	0.304136	0.790754	0.121655	0.790754	0.0608273	0.425791	0	0.0608273
				RC9 gut group		6	2				1	5.49183		1.82482	1.58151	2.85888	2.85888	1.58151	1.45985	1.09489	1.52068	1.64234	1.82482	0.486618	10.9489	24.7567	22.4453
	Bacteroidetes	Bacteroidia	Bacteroidales	unclassified		9	0				0.642857	0.438825		0	0.0608273	0	0.6691	0.851582	0.547445	1.45985	0.608273	0.121655	0.0608273	0.121655	0.243309	1.3382	0.0608273
			Bacteroidales			32	5				1	16.3365		2.73723	4.31873	14.8418	22.2628	19.8905	16.7883	19.9513	13.3212	16.18	8.81995	5.77859	22.1411	36.3747	25.3041
		Bacteroidia				32	5		2.57453		1	16.3365		2.73723	4.31873	14.8418	22.2628	19.8905	16.7883	19.9513	13.3212	16.18	8.81995	5.77859	22.1411	36.3747	25.3041
		Flavobacteria				–	–				0.428571	0.11731		0.182482	0.0608273	0	0.182482	0	0	0	0	0.0608273	0.243309	0	0.121655	0.6691	0.121655
		Sphingobacteria				–	–				1	0.855926		0.121655	0.121655	0.364964	0.608273	0.608273	1.15572	1.21655	2.18978	4.07543	0.182482	0.304136	0.486618	0.182482	0.364964
		unclassified				1	0		0.0885134		0.5	0.195516		0	0	0	0.304136	0.425791	0.121655	0.425791	0.364964	0.608273	0.0608273	0	0.0608273	0.304136	0.0608273
	Bacteroidetes					33	5		2.66305		1	17.5052		3.04136	4.50122	15.2068	23.3577	20.9246	18.0657	21.5937	15.8759	20.9246	9.30657	6.08273	22.8102	37.5304	25.8516
	Chloroflexi	Dehalococcoidia	Dehalococcoidales	Dehalococcoidaceae	FW60 group	7	4				0.285714	0.10862		0	0	0	0.182482	0	0.486618	0.304136	0.0608273	0.425791	0.0608273	0	0	0	0
				Dehalococcoidaceae		7	4				0.285714	0.10862		0	0	0	0.182482	0	0.486618	0.304136	0.0608273	0.425791	0.0608273	0	0	0	0
	Chloroflexi	Dehalococcoidia	Dehalococcoidales	unclassified	unclassified	1	1				0.0714286	0.0173792		0	0	0	0	0	0	0.0608273	0	0.182482	0	0	0	0	0
				Dehalobiaceae		1	1					0.0173792		0	0	0	0	0	0	0.0608273	0	0.182482	0	0	0	0	0
			Dehalococcoidales			8	5				0.285714	0.125999		0	0	0	0.182482	0	0.486618	0.364964	0.0608273	0.608273	0.0608273	0	0	0	0
		Dehalococcoidia				8	5		0.0804365		0.285714	0.125999		0	0	0	0.182482	0	0.486618	0.364964	0.0608273	0.608273	0.0608273	0	0	0	0
	Chloroflexi					8	5		0.0804365		0.428571	0.247654		0	0	0	0.182482	0	0.486618	0.364964	0.0608273	0.729927	0.121655	1.39903	0.0608273	0	0.0608273
	Cloacimonetes	Cloacimonadia	Cloacimonadales	CW-1 termite group	unclassified	2	2				0.285714	0.408412		0	0	0	0.364964	0	0	1.03406	3.83212	0	0.425791	0.0608273	0	0	0
				CW-1 termite group		2	2				0.285714	0.408412		0	0	0	0.364964	0	0	1.03406	3.83212	0	0.425791	0.0608273	0	0	0
			Cloacimonadales			2	2				0.285714	0.408412		0	0	0	0.364964	0	0	1.03406	3.83212	0	0.425791	0.0608273	0	0	0
		Cloacimonadia				2	2		0.186529		0.285714	0.408412		0	0	0	0.364964	0	0	1.03406	3.83212	0	0.425791	0.0608273	0	0	0
	Cloacimonetes					2	2		0.186529		0.285714	0.408412		0	0	0	0.364964	0	0	1.03406	3.83212	0	0.425791	0.0608273	0	0	0
	Deferribacteres	Deferribacteres	Deferribacterales	Deferribacteraceae	Mucispirillum	–	–				0.5	0.286757		0	0	0.0608273	0	0	0	0.121655	0.243309	0.243309	0.182482	0	1.39903	0.486618	1.27737
				Deferribacteraceae		–	–				0.5	0.286757		0	0	0.0608273	0	0	0	0.121655	0.243309	0.243309	0.182482	0	1.39903	0.486618	1.27737
			Deferribacterales			–	–				0.5	0.286757		0	0	0.0608273	0	0	0	0.121655	0.243309	0.243309	0.182482	0	1.39903	0.486618	1.27737
		Deferribacteres				–	–				0.5	0.286757		0	0	0.0608273	0	0	0	0.121655	0.243309	0.243309	0.182482	0	1.39903	0.486618	1.27737
	Deferribacteres					–	–				0.5	0.286757		0	0	0.0608273	0	0	0	0.121655	0.243309	0.243309	0.182482	0	1.39903	0.486618	1.27737
	Elusimicrobia	Elusimicrobia	Elusimicrobiales	Elusimicrobiaceae	Elusimicrobium	1	0				0.428571	0.134689		0	0	0	0.0608273	0.304136	0.0608273	0.121655	0	0.182482	0.304136	0	0	0.486618	0.364964
				Elusimicrobiaceae		1	0				0.428571	0.134689		0	0	0	0.0608273	0.304136	0.0608273	0.121655	0	0.182482	0.304136	0	0	0.486618	0.364964
			Elusimicrobiales			1	0				0.428571	0.134689		0	0	0	0.0608273	0.304136	0.0608273	0.121655	0	0.182482	0.304136	0	0	0.486618	0.364964
		Elusimicrobia				1	0		0.111195		0.428571	0.134689		0	0	0	0.0608273	0.304136	0.0608273	0.121655	0	0.182482	0.304136	0	0	0.486618	0.364964
	Elusimicrobia	Endomicrobia	Endomicrobiales	Endomicrobiaceae	Endomicrobium	7	2				0.714286	0.656065		0.243309	0	0	2.0073	0.364964	0.425791	1.82482	3.16302	0.243309	0.0608273	0.182482	0.304136	0.0608273	0.304136
	Elusimicrobia	Elusimicrobia	Endomicrobiales	Endomicrobiaceae	unclassified	1	0				0	0.0043448		0	0	0	0	0	0	0	0	0	0	0.0608273	0	0	0
				Endomicrobiaceae		8	2				0.714286	0.66041		0.243309	0	0	2.0073	0.364964	0.425791	1.82482	3.16302	0.243309	0.0608273	0.243309	0.304136	0.0608273	0.304136
			Endomicrobiales			8	2				0.714286	0.66041		0.243309	0	0	2.0073	0.364964	0.425791	1.82482	3.16302	0.243309	0.0608273	0.243309	0.304136	0.0608273	0.304136
		Endomicrobia				8	2		0.266795		0.857143	0.795099		0.243309	0	0	2.06813	0.6691	0.486618	1.94647	3.16302	0.425791	0.364964	0.243309	0.304136	0.547445	0.6691
	Elusimicrobia					9	2		0.377989		0.857143	0.795099		0.243309	0	0	2.06813	0.6691	0.486618	1.94647	3.16302	0.425791	0.364964	0.243309	0.304136	0.547445	0.6691
	Epsilonbacteraeota	Campylobacteria	Campylobacterales	Campylobacteraceae	Arcobacter	–	–				0.357143	0.89503		0	0.121655	0	0	0	0	0	0	0	0.486618	0	0.912409	8.0292	2.98054
				Arcobacteraceae		–	–				0.357143	0.89503		0	0.121655	0	0	0	0	0	0	0	0.486618	0	0.912409	8.0292	2.98054
	Epsilonbacteraeota	Campylobacteria	Campylobacterales	Campylobacteraceae	Sulfurospirillum	–	–				0.428571	0.55179		0.121655	0	0	1.03406	0	0	0	0	0	0.121655	0	0.182482	0.304136	5.96107
				Campylobacteraceae		–	–				0.428571	0.55179		0.121655	0	0	1.03406	0	0	0	0	0	0.121655	0	0.182482	0.304136	5.96107
			Campylobacterales			–	–				0.571429	1.52503		0.121655	0.121655	0.6691	1.39903	0	0	0	0	0	0.608273	0	1.09489	8.39416	8.94161
		Campylobacteria				–	–				0.571429	1.52503		0.121655	0.121655	0.6691	1.39903	0	0	0	0	0	0.608273	0	1.09489	8.39416	8.94161
	Epsilonproteobacteria					–	–				0.571429	1.52503		0.121655	0.121655	0.6691	1.39903	0	0	0	0	0	0.608273	0	1.09489	8.39416	8.94161
	Candidate_phylum_TG3	Chitinivibrionia	Chitinispirillales	Chitinispirillaceae	Termite cluster A	1	1				0.357143	0.395377		0.486618	3.16302	1.09489	0	0	0.182482	0	0	0	0	0	0.608273	0	0
	Candidate_phylum_TG3	Chitinivibrionia	Chitinispirillales	Chitinispirillaceae	Termite cluster B	4	0				0.285714	0.847237		4.50122	0	0	6.38686	0.0608273	0.0608273	0	0.486618	0	0.0608273	0.0608273	0.243309	0	0
				Chitinispirillaceae		5	1				0.5	1.25565		4.98783	3.16302	1.09489	6.38686	0.0608273	0.425791	0	0.486618	0	0.0608273	0.0608273	0.851582	0	0
			Chitinispirillales			5	1				0.5	1.25565		4.98783	3.16302	1.09489	6.38686	0.0608273	0.425791	0	0.486618	0	0.0608273	0.0608273	0.851582	0	0
					Termite cluster	2	1				0.571429	0.186827		0.425791	0.6691	0.243309	0.0608273	0.425791	0.121655	0.243309	0.0608273	0	0.182482	0	0.121655	0.0608273	0
				Chitinivibrionaceae		2	1				0.571429	0.186827		0.425791	0.6691	0.243309	0.0608273	0.425791	0.121655	0.243309	0.0608273	0	0.182482	0	0.121655	0.0608273	0
			Chitinivibrionales			2	1				0.571429	0.186827		0.425791	0.6691	0.243309	0.0608273	0.425791	0.121655	0.243309	0.0608273	0	0.182482	0	0.121655	0.0608273	0
		Chitinivibrionia				7	2		5.91182		0.714286	1.38165		5.41363	3.83212	1.3382	6.44769	0.486618	0.547445	0.243309	0.547445	0	0.243309	0.0608273	0.121655	0.0608273	0
	Fibrobacteres	Fibrobacteria	Fibrobacterales	Fibrobacteraceae	Fibromonas	6	0				0.642857	1.73358		6.20438	8.57664	0.182482	1.70316	4.92701	0.0608273	0	0.304136	0	0	0	0.243309	1.94647	0.121655
				Fibrobacteraceae		6	0				0.642857	1.73358		6.20438	8.57664	0.182482	1.70316	4.92701	0.0608273	0	0.304136	0	0	0	0.243309	1.94647	0.121655
			Fibrobacterales			6	0				0.642857	1.73358		6.20438	8.57664	0.182482	1.70316	4.92701	0.0608273	0	0.304136	0	0	0	0.243309	1.94647	0.121655
		Fibrobacteria				6	0		0.69449		0.642857	1.73358		6.20438	8.57664	0.182482	1.70316	4.92701	0.0608273	0	0.304136	0	0	0	0.243309	1.94647	0.121655
	Fibrobacteres					13	2		6.60631		0.857143	3.17605		11.618	12.4088	1.52068	8.15085	5.41363	0.608273	0.243309	0.851582	0	0.243309	0.0608273	1.21655	2.0073	0.121655
			Bacillales			–	–				0.428571	0.751651		0.0608273	0	0.182482	0	0	0.0608273	0.0608273	0.0608273	0.364964	0.182482	6.26521	2.37226	0	0.912409
	Firmicutes	Bacilli	Lactobacillales	Streptococcaceae	Lactococcus	4	1				0.357143	0.265033		0	0	2.49392	0	0	0	0	0.547445	0.364964	0.121655	0	0.0608273	0	0.121655
	Firmicutes	Bacilli	Lactobacillales	Streptococcaceae	Lactovum	–	–				0.357143	0.269378		0	0	0.364964	0	0.0608273	0.304136	0.729927	0	0.729927	0	0	1.58151	0	0
				Streptococcaceae		4	1				0.714286	0.764685		0.182482	0.0608273	3.04136	0	0.182482	0.790754	0.912409	0.973236	1.64234	0.182482	0.0608273	2.06813	0	0.608273
			Lactobacillales			4	1				1	1.26868		0.6691	0.6691	4.37956	0.121655	0.304136	0.912409	1.15572	1.03406	2.6764	0.304136	0.121655	2.55474	0.364964	2.49392
		Bacilli				4	1		0.135365		1	2.08985		0.790754	0.6691	4.56204	0.121655	0.364964	1.03406	1.27737	1.21655	3.46715	0.486618	6.44769	5.04866	0.364964	3.40633
	Firmicutes	Clostridia	Clostridiales	Christensenellaceae	R-7 group	9	0				0.928571	1.75096		0.0608273	0.486618	0.547445	0.608273	0.973236	1.82482	1.39903	0.243309	4.25791	2.85888	7.23844	0.790754	1.58151	1.64234
				Christensenellaceae		9	0				0.928571	1.75096		0.0608273	0.486618	0.547445	0.608273	0.973236	1.82482	1.39903	0.243309	4.25791	2.85888	7.23844	0.790754	1.58151	1.64234
				Clostridiaceae		–	–				0.785714	0.269378		0.0608273	0.0608273	0.304136	0	0.121655	0.182482	0.851582	0.182482	0.243309	0.182482	0.425791	0.182482	0.121655	0.851582
	Firmicutes	Clostridia	Clostridiales	Defluviitaleaceae	Candidatus Arthromitus	67	6				1	3.05005		0.608273	0.729927	3.04136	1.82482	0.608273	1.3382	2.49392	1.27737	6.81265	7.90754	3.40633	6.20438	4.0146	2.43309
				Defluviitaleaceae		67	6				1	3.05005		0.608273	0.729927	3.04136	1.82482	0.608273	1.3382	2.49392	1.27737	6.81265	7.90754	3.40633	6.20438	4.0146	2.43309
	Firmicutes	Clostridia	Clostridiales	Eubacteriaceae	Anaerofustis	2	2				0	0.0043448		0	0	0	0	0.0608273	0	0	0	0	0	0	0	0	0
				Eubacteriaceae		2	2				0	0.0043448		0	0	0	0	0.0608273	0	0	0	0	0	0	0	0	0
	Firmicutes	Clostridia	Clostridiales	Family XIII	Anaerovorax group	3	1				0.714286	0.386688		0.0608273	0.121655	0.182482	0.364964	0.364964	0.547445	0.6691	0.486618	0.729927	1.15572	0.729927	0	0	0
	Firmicutes	Clostridia	Clostridiales	Family XIII	Rs-M13 group	2	2				1	0.643031		0.121655	0.121655	0.364964	0.243309	0.790754	1.15572	0.729927	0.425791	0.973236	0.6691	1.64234	0.6691	0.425791	0.6691
	Firmicutes	Clostridia	Clostridiales	Family XIII	unclassified	1	0				0.785714	0.243309		0	0.121655	0.304136	0.0608273	0.364964	0.364964	0.243309	0.243309	0.608273	0.364964	0.425791	0	0.182482	0.121655
				Family XIII		6	3				1	1.36861		0.243309	0.364964	0.912409	0.6691	1.58151	2.06813	1.76399	1.15572	2.6764	2.37226	2.79805	1.09489	0.6691	0.790754
	Firmicutes	Clostridia	Clostridiales	Lachnospiraceae	NK4A136 group	4	2				1	2.73288		0.425791	0.425791	0.364964	0.851582	0.973236	6.87348	2.0073	1.64234	3.10219	5.3528	9.18491	2.06813	3.28467	1.70316
				Lachnospiraceae		4	2				1	2.73288		0.425791	0.425791	0.364964	0.851582	0.973236	6.87348	2.0073	1.64234	3.10219	5.3528	9.18491	2.06813	3.28467	1.70316
	Firmicutes	Clostridia	Clostridiales	Peptococcaceae	Uncultured 2	7	2				0.571429	0.269378		0	0	0.0608273	0.0608273	0.790754	1.09489	0.304136	0.0608273	0.243309	0.0608273	0.364964	0.182482	0.425791	0.121655
	Firmicutes	Clostridia	Clostridiales	Peptococcaceae	Uncultured 5	4	1				0.928571	0.747306		0.121655	0.121655	0.243309	0.912409	1.21655	2.12895	1.70316	2.37226	0.486618	0.364964	0.425791	0.121655	0.243309	0
	Firmicutes	Clostridia	Clostridiales	Peptococcaceae	ST10 group	3	3				0.285714	0.199861		0	0	0	0	0	0	0.486618	0	0	1.15572	0.973236	0	0	0.182482
	Firmicutes	Clostridia	Clostridiales	Peptococcaceae	unclassified	2	1				0.357143	0.0912409		0	0	0	0	0.243309	0.121655	0.0608273	0.121655	0.547445	0.182482	0	0	0	0
				Peptococcaceae		16	7				1	2.33316		0.243309	0.243309	0.608273	1.94647	4.25791	6.56934	4.56204	4.98783	2.06813	2.18978	2.61557	0.608273	1.3382	0.425791
	Firmicutes	Clostridia	Clostridiales	Ruminococcaceae	[Eubacterium] coprostanoligenes group	13	2				0.928571	1.34689		0.0608273	0.790754	2.0073	2.0073	2.73723	2.25061	1.64234	1.27737	1.09489	1.52068	2.25061	0.182482	0.6691	0.364964
	Firmicutes	Clostridia	Clostridiales	Ruminococcaceae	Flavonifractor group	9	5				0.714286	0.66041		0	0.0608273	0.608273	0	0.973236	2.12895	0.851582	0.243309	1.03406	0.364964	0.973236	0	1.52068	0.486618
	Firmicutes	Clostridia	Clostridiales	Ruminococcaceae	Gut cluster 1	1	1				0.714286	0.195516		0	0.0608273	0.121655	0.121655	0	0.364964	0.243309	0	0.304136	0.121655	0.425791	0.121655	0.486618	0.364964
	Firmicutes	Clostridia	Clostridiales	Ruminococcaceae	Gut cluster 9	–	–				0.785714	0.460549		0	0	0.243309	0.121655	0.547445	0.547445	0.425791	0.243309	1.64234	0.912409	1.39903	0	0.243309	0.121655
	Firmicutes	Clostridia	Clostridiales	Ruminococcaceae	PeH56 group	5	2				0.785714	1.45116		0	0	0.0608273	0.182482	0.364964	0.182482	0.608273	2.91971	0.6691	1.58151	0.425791	4.37956	6.20438	2.73723
	Firmicutes	Clostridia	Clostridiales	Ruminococcaceae	Rs-088 termite group	–	–				0.5	0.186827		0	0	0.729927	0	0.547445	0.304136	0.182482	0	0.425791	0.243309	0.121655	0	0	0.0608273
	Firmicutes	Clostridia	Clostridiales	Ruminococcaceae	Rs-P74 termite group	–	–				0.571429	0.308481		0.121655	0.182482	0.0608273	0	0	0	0.121655	0.121655	0	0.425791	0	1.70316	0.425791	1.15572
	Firmicutes	Clostridia	Clostridiales	Ruminococcaceae	Ruminiclostridium 1	1	1				0.785714	0.503997		0.304136	0.0608273	0.182482	0.243309	0.121655	0.182482	0.182482	0.608273	1.52068	0.790754	2.12895	0.729927	0	0
	Firmicutes	Clostridia	Clostridiales	Ruminococcaceae	Ruminiclostridium 6	17	7				0.357143	0.360619		0	0	0.486618	0	0.364964	0	1.27737	2.37226	0.0608273	0.425791	0	0.0608273	0	0
	Firmicutes	Clostridia	Clostridiales	Ruminococcaceae	Ruminococcus 1	1	1				0.428571	0.169447		0	0.121655	0.973236	0.0608273	0.243309	0.121655	0.0608273	0.304136	0	0.0608273	0	0	0.425791	0
	Firmicutes	Clostridia	Clostridiales	Ruminococcaceae	UCG-010 Gut cluster 4	9	4				0.928571	1.09489		0	0.182482	0.425791	0.973236	1.27737	1.03406	2.0073	1.03406	1.82482	4.37956	1.70316	0.121655	0.243309	0.121655
	Firmicutes	Clostridia	Clostridiales	Ruminococcaceae	UCG-010 Gut cluster 5	14	4				0.5	0.460549		0	0.121655	0	0.243309	0	0.0608273	0.0608273	0.0608273	0.121655	3.52798	1.64234	0.0608273	0.304136	0.243309
	Firmicutes	Clostridia	Clostridiales	Ruminococcaceae	UCG-010 Uncultured 20	2	1				0.285714	0.0825513		0	0.0608273	0	0.0608273	0	0.0608273	0.425791	0	0	0.121655	0.121655	0	0.304136	0
	Firmicutes	Clostridia	Clostridiales	Ruminococcaceae	UCG-010 Uncultured 24	4	2				0.857143	2.54171		0.547445	0.486618	0.364964	4.44039	3.95377	2.73723	4.62287	8.39416	0.912409	3.58881	5.3528	0.182482	0	0
	Firmicutes	Clostridia	Clostridiales	Ruminococcaceae	UCG-014 Gut cluster 7	6	0				0.857143	1.25999		0.0608273	0	1.58151	0.243309	1.27737	1.21655	3.71046	0.729927	1.76399	1.15572	4.62287	0.547445	0.243309	0.486618
	Firmicutes	Clostridia	Clostridiales	Ruminococcaceae	unclassified	13	0				1	4.16232		0.304136	0.304136	0.6691	5.04866	6.38686	6.99513	9.3674	5.23114	3.83212	8.09002	9.54988	1.03406	0.912409	0.547445
				Ruminococcaceae		95	31				1	15.8846		1.45985	2.61557	8.63747	14.5377	19.4647	19.2822	27.9805	24.0876	15.6934	27.9197	31.326	9.61071	12.7737	6.99513
				Syntrophomonadaceae		–	–				0.5	0.130344		0	0.0608273	0	0.121655	0.121655	0.121655	0.0608273	0.182482	0.6691	0.243309	0	0	0.0608273	0.182482
	Firmicutes	Clostridia	Clostridiales	Clostridiales vadinBB60 group	Gut cluster 14	2	1				0.428571	0.238964		0.486618	0.486618	0.304136	0.243309	0.121655	0.0608273	0	0	0.0608273	0.0608273	0	0.0608273	1.39903	0.0608273
	Firmicutes	Clostridia	Clostridiales	Clostridiales vadinBB60 group	Gut cluster 15	14	9				0.857143	0.76903		1.76399	0.0608273	0.425791	0.182482	0.486618	0.425791	0.121655	1.27737	1.27737	0.6691	0.364964	2.0073	1.70316	0
	Firmicutes	Clostridia	Clostridiales	Clostridiales vadinBB60 group	Termite cluster	10	8				0.928571	1.02103		2.6764	0.851582	2.18978	0.243309	0.973236	0.121655	1.45985	1.15572	0.729927	1.45985	1.76399	0.486618	0	0.182482
	Firmicutes	Clostridia	Clostridiales	Clostridiales vadinBB60 group	unclassified	2	2				0.142857	0.0260688		0.0608273	0	0.121655	0	0	0	0.0608273	0	0	0	0	0	0	0.121655
				vadinBB60 group		28	20				1	2.02902		4.92701	1.39903	2.91971	0.6691	1.58151	0.608273	1.58151	2.43309	2.06813	2.18978	2.12895	2.55474	3.10219	0.243309
	Firmicutes	Clostridia	Clostridiales	unclassified		2	0				0.714286	0.43448		0	0	0.121655	0.304136	1.27737	0.851582	1.52068	0.6691	0.304136	0.486618	0.0608273	0.243309	0.182482	0.0608273
			Clostridiales			229	71				1	28.3846		7.84672	6.20438	17.0925	19.4647	26.9465	33.455	40.0852	32.4209	35.9489	50.365	58.1509	24.635	27.9805	16.7883
		Clostridia				229	71		8.794		1	30.0443		7.96837	6.38686	17.3966	20.6204	29.5012	37.5912	43.1873	35.4015	38.1995	52.7372	60.6448	24.9392	28.7713	17.2749
	Firmicutes	Erysipelotrichi	Erysipelotrichales	Turicibacteraceae	Turicibacter	3	1				0.428571	0.247654		0.0608273	0	0.121655	0	0	0	0.486618	0.182482	1.09489	0.0608273	1.09489	0.304136	0	0.0608273
				Turicibacteraceae		3	1				0.428571	0.269378		0.0608273	0	0.121655	0	0	0.0608273	0.486618	0.182482	1.09489	0.0608273	1.3382	0.304136	0	0.0608273
				unclassified		1	0				0	0.00868961		0	0	0	0	0	0.0608273	0	0	0	0	0.0608273	0	0	0
			Erysipelotrichales			4	1				0.428571	0.269378		0.0608273	0	0.121655	0	0	0.0608273	0.486618	0.182482	1.09489	0.0608273	1.3382	0.304136	0	0.0608273
		Erysipelotrichia				4	1		0.30168		0.428571	0.269378		0.0608273	0	0.121655	0	0	0.0608273	0.486618	0.182482	1.09489	0.0608273	1.3382	0.304136	0	0.0608273
	Firmicutes	Negativicutes	Selenomonadales	Veillonellaceae		–	–				0.857143	0.556135		0.0608273	0.364964	0.121655	0.121655	0.364964	0.425791	0.243309	0.121655	0.364964	0.425791	0.0608273	2.37226	0.973236	1.76399
			Selenomonadales			–	–				0.857143	0.556135		0.0608273	0.364964	0.121655	0.121655	0.364964	0.425791	0.243309	0.121655	0.364964	0.425791	0.0608273	2.37226	0.973236	1.76399
		Negativicutes				–	–				0.857143	0.556135		0.0608273	0.364964	0.121655	0.121655	0.364964	0.425791	0.243309	0.121655	0.364964	0.425791	0.0608273	2.37226	0.973236	1.76399
	Firmicutes	unclassified				–	–				0.857143	0.499652		0.364964	0.0608273	0.486618	0.182482	0.547445	0.304136	0.851582	0.547445	2.61557	0.243309	0.364964	0.243309	0.0608273	0.121655
		unclassified				–	–				0.857143	0.499652		0.364964	0.0608273	0.486618	0.182482	0.547445	0.304136	0.851582	0.547445	2.61557	0.243309	0.364964	0.243309	0.0608273	0.121655
	Firmicutes					237	73		9.23105		1	33.4984		9.24574	7.48175	22.6886	21.0462	30.9002	39.4161	46.0462	37.4696	45.8029	53.9538	68.8564	32.9075	30.5353	22.6277
	Fusobacteria	Fusobacteria	Fusobacteriales	Leptotrichiaceae	Sebaldella	–	–				0.0714286	0.143379		0	0	0	0.0608273	0	0	0	0	0	0.0608273	0	1.88564	0	0
				Leptotrichiaceae		–	–				0.0714286	0.143379		0	0	0	0.0608273	0	0	0	0	0	0.0608273	0	1.88564	0	0
			Fusobacteriales			–	–				0.285714	0.186827		0	0.182482	0	0.0608273	0	0	0	0	0	0.304136	0	1.88564	0.182482	0
		Fusobacteriia				–	–				0.285714	0.186827		0	0.182482	0	0.0608273	0	0	0	0	0	0.304136	0	1.88564	0.182482	0
	Fusobacteria					–	–				0.285714	0.186827		0	0.182482	0	0.0608273	0	0	0	0	0	0.304136	0	1.88564	0.182482	0
	Kiritimatiellaeota	Kiritimatiellae	WCHB1-41	RFP12	CVer-1	3	3				0.357143	0.125999		0	0.0608273	0	0.0608273	0.121655	0.425791	0	0.0608273	0.304136	0.425791	0.304136	0	0	0
				RFP12		3	3				0.357143	0.125999		0	0.0608273	0	0.0608273	0.121655	0.425791	0	0.0608273	0.304136	0.425791	0.304136	0	0	0
	Kiritimatiellaeota	Kiritimatiellae	WCHB1-41	WCHB1-25	CVer-2	2	0				0.214286	0.0782065		0	0	0	0	0.0608273	0.0608273	0	0	0.425791	0.304136	0.243309	0	0	0
				WCHB1-25		2	0				0.214286	0.0782065		0	0	0	0	0.0608273	0.0608273	0	0	0.425791	0.304136	0.243309	0	0	0
			WCHB1-41			5	3				0.571429	0.312826		0	0.0608273	0.121655	0.0608273	0.364964	0.547445	0.182482	0.0608273	1.03406	0.973236	0.608273	0.0608273	0.0608273	0.243309
		Kiritimatiellae				5	3		0.254885		0.571429	0.312826		0	0.0608273	0.121655	0.0608273	0.364964	0.547445	0.182482	0.0608273	1.03406	0.973236	0.608273	0.0608273	0.0608273	0.243309
	Kiritimatiellaeota					5	3		0.254885		0.571429	0.312826		0	0.0608273	0.121655	0.0608273	0.364964	0.547445	0.182482	0.0608273	1.03406	0.973236	0.608273	0.0608273	0.0608273	0.243309
	Microgenomates	Microgenomatia	Candidatus Pacebacteria	unclassified		1	1				0.785714	0.638686		0.121655	0.182482	0.0608273	0.0608273	0.0608273	0.121655	0.243309	0.182482	0.547445	0.243309	0.364964	3.71046	1.94647	1.09489
			Candidatus Pacebacteria			1	1				0.785714	0.638686		0.121655	0.182482	0.0608273	0.0608273	0.0608273	0.121655	0.243309	0.182482	0.547445	0.243309	0.364964	3.71046	1.94647	1.09489
		Microgenomatia				1	1		0.638686		0.785714	0.638686		0.121655	0.182482	0.0608273	0.0608273	0.0608273	0.121655	0.243309	0.182482	0.547445	0.243309	0.364964	3.71046	1.94647	1.09489
	Microgenomates					1	1		0.638686		0.785714	0.638686		0.121655	0.182482	0.0608273	0.0608273	0.0608273	0.121655	0.243309	0.182482	0.547445	0.243309	0.364964	3.71046	1.94647	1.09489
	Planctomycetes	Phycisphaerae	Tepidisphaerales	CPla-3 termite group	unclassified	2	1				0.0714286	0.00868961		0	0	0	0	0	0	0	0	0	0	0.121655	0	0	0
				CPla-3 termite group		2	1				0.0714286	0.00868961		0	0	0	0	0	0	0	0	0	0	0.121655	0	0	0
	Planctomycetes	Phycisphaerae	Tepidisphaerales	Pla1 lineage	unclassified	1	1				0.0714286	0.021724		0	0	0	0	0	0	0	0	0.243309	0	0.0608273	0	0	0
				Pla1 lineage		1	1				0.0714286	0.021724		0	0	0	0	0	0	0	0	0.243309	0	0.0608273	0	0	0
			Tepidisphaerales			3	2				0.142857	0.0304136		0	0	0	0	0	0	0	0	0.243309	0	0.182482	0	0	0
	Planctomycetes	Phycisphaerae	AKAU3564 sediment group	unclassified		1	1				0	0		0	0	0	0	0	0	0	0	0	0	0	0	0	0
			AKAU3564 sediment group			1	1				0	0		0	0	0	0	0	0	0	0	0	0	0	0	0	0
		Phycisphaerae				4	3		0.3505		0.142857	0.0304136		0	0	0	0	0	0	0	0	0.243309	0	0.182482	0	0	0
	Planctomycetes	Planctomycetacia	Pirellulales	Pirellulaceae	p-1088-a5 gut group	–	–				0.285714	0.160758		0	0	0	0	0	0	0	0	0.304136	0	0	0.851582	0.547445	0.547445
	Planctomycetes	Planctomycetacia	Pirellulales	Pirellulaceae	Rs-B01 termite group	7	4				0.142857	0.0521376		0.0608273	0	0	0	0.121655	0	0	0	0.0608273	0.304136	0.0608273	0	0.0608273	0.0608273
	Planctomycetes	Planctomycetacia	Pirellulales	Pirellulaceae	unclassified	–	–				0.214286	0.11731		0	0.0608273	0	0	0	0	0	0	0.425791	0.0608273	0	0.729927	0	0.364964
				Pirellulaceae		7	4				0.428571	0.347584		0.0608273	0.0608273	0	0	0.121655	0	0	0	0.912409	0.364964	0.0608273	1.70316	0.608273	0.973236
			Pirellulales			7	4				0.428571	0.347584		0.0608273	0.0608273	0	0	0.121655	0	0	0	0.912409	0.364964	0.0608273	1.70316	0.608273	0.973236
		Planctomycetacia				7	4		0.272114		0.428571	0.347584		0.0608273	0.0608273	0	0	0.121655	0	0	0	0.912409	0.364964	0.0608273	1.70316	0.608273	0.973236
	Planctomycetes	vadinHA49	QEDV2DF10 group	Insect cluster	unclassified	1	1				0.214286	0.573514		0	0	0	0	0.0608273	0	0	0.0608273	0	0.0608273	0.0608273	1.64234	2.79805	3.3455
				Insect cluster		1	1				0.214286	0.573514		0	0	0	0	0.0608273	0	0	0.0608273	0	0.0608273	0.0608273	1.64234	2.79805	3.3455
			QEDV2DF10 group			1	1				0.214286	0.573514		0	0	0	0	0.0608273	0	0	0.0608273	0	0.0608273	0.0608273	1.64234	2.79805	3.3455
		vadinHA49				1	1		0.0514991		0.214286	0.573514		0	0	0	0	0.0608273	0	0	0.0608273	0	0.0608273	0.0608273	1.64234	2.79805	3.3455
	Planctomycetes					12	8		0.674113		0.571429	0.955857		0.0608273	0.0608273	0	0	0.182482	0	0	0.121655	1.15572	0.425791	0.304136	3.3455	3.40633	4.31873
			Caulobacterales			–	–				0	0.0043448		0	0	0	0	0	0	0	0	0	0	0	0.0608273	0	0
	Proteobacteria	Alphaproteobacteria	Rhizobiales	Beijerinckiaceae		2	0				0	0.0043448		0	0	0	0	0	0	0	0	0	0	0	0.0608273	0	0
	Proteobacteria	Alphaproteobacteria	Rhizobiales	Xanthobacteraceae	Bradyrhizobium	1	1				0.285714	0.139034		0	0	0	0	0	0.0608273	0.243309	0	0.6691	0.121655	0.851582	0	0	0
				Xanthobacteraceae		1	1				0.357143	0.178137		0	0	0	0	0	0.0608273	0.304136	0	0.790754	0.121655	1.09489	0	0	0.121655
			Rhizobiales			3	1				0.642857	0.299791		0	0	0	0.243309	0.121655	0.121655	0.304136	0	1.52068	0.121655	1.45985	0.121655	0.0608273	0.121655
	Proteobacteria	Alphaproteobacteria	Reyranellales	Reyranellaceae	PMB07 group	3	2				0.571429	0.195516		0.364964	0.729927	0	0	0.182482	0.121655	0	0.0608273	0.243309	0.121655	0	0.364964	0.547445	0
	Proteobacteria	Alphaproteobacteria	Rhodospirillales_1	Reyranellaceae		3	2				0.571429	0.195516		0.364964	0.729927	0	0	0.182482	0.121655	0	0.0608273	0.243309	0.121655	0	0.364964	0.547445	0
			Reyranellales			3	2				0.571429	0.195516		0.364964	0.729927	0	0	0.182482	0.121655	0	0.0608273	0.243309	0.121655	0	0.364964	0.547445	0
	Proteobacteria	Alphaproteobacteria	Rhodospirillales_1	Rs-B50 group	Termite group	14	8				0.357143	0.0999305		0	0	0	0.364964	0	0	0	0.0608273	0.121655	0.182482	0.0608273	0.182482	0	0.425791
	Proteobacteria	Alphaproteobacteria	Rhodospirillales_1	Rs-B50 group		14	8				0.357143	0.0999305		0	0	0	0.364964	0	0	0	0.0608273	0.121655	0.182482	0.0608273	0.182482	0	0.425791
			Rhodospirillales			14	8				0.642857	0.230275		0	0	0	0.364964	0.0608273	0.182482	0.121655	0.0608273	0.364964	0.182482	0.121655	0.608273	0.547445	0.608273
			Rickettsiales			–	–				0.428571	0.156413		0.0608273	0.0608273	0	0.912409	0.243309	0.121655	0.0608273	0	0.0608273	0.304136	0.121655	0.243309	0	0
			Sphingomonadales			–	–				0.285714	0.10862		0	0	0	0	0	0	0	0	0.364964	0	0.729927	0.182482	0	0.243309
	Proteobacteria	Alphaproteobacteria	unclassified			3	0				0.428571	0.165103		0.0608273	0	0	0.121655	0	0	0.304136	0.121655	0.121655	0	0	0.364964	0.0608273	1.15572
		Alphaproteobacteria				23	11		1.94676		0.928571	1.18179		0.547445	0.790754	0	1.64234	0.608273	0.6691	0.851582	0.243309	2.79805	0.729927	2.61557	1.76399	0.6691	2.61557
	Proteobacteria	Deltaproteobacteria	Adiutricales	Adiutricaceae	Termite cluster 1	–	–				0.214286	0.199861		0	0	0	0	0	0	0	0	0	0	0	0.851582	0.608273	1.3382
	Proteobacteria	Deltaproteobacteria	Adiutricales	Adiutricaceae	Termite cluster 3	1	1				0.571429	0.477928		2.37226	0.6691	1.15572	0.486618	0	0.608273	0.790754	0.121655	0	0.0608273	0.304136	0.0608273	0.0608273	0
				Adiutricaceae		1	1				0.571429	0.477928		2.37226	0.6691	1.15572	0.486618	0	0.608273	0.790754	0.121655	0	0.0608273	0.304136	0.0608273	0.0608273	0
			Adiutricales			1	1				0.785714	0.860271		2.43309	0.729927	1.15572	1.03406	0.0608273	0.6691	1.09489	0.182482	0	0.0608273	0.304136	1.94647	0.6691	1.70316
	Proteobacteria	Deltaproteobacteria	Deltaproteobacteria incertae sedis	MBNT15	unclassified	2	1				0.214286	0.0738617		0	0	0	0	0.121655	0.6691	0	0	0.0608273	0.121655	0.0608273	0	0	0
				MBNT15		2	1				0.214286	0.0738617		0	0	0	0	0.121655	0.6691	0	0	0.0608273	0.121655	0.0608273	0	0	0
			Deltaproteobacteria incertae sedis			2	1				0.214286	0.0738617		0	0	0	0	0.121655	0.6691	0	0	0.0608273	0.121655	0.0608273	0	0	0
	Proteobacteria	Deltaproteobacteria	Desulfobacterales	Desulfobulbaceae	Desulforhopalus	–	–				0.357143	0.10862		0	0	0	0.243309	0	0.0608273	0.425791	0	0	0.364964	0.182482	0	0	0.243309
	Proteobacteria	Deltaproteobacteria	Desulfobacterales	Desulfobulbaceae	Desulfobulbus	4	0				0.285714	0.0999305		0	0.0608273	0	0.0608273	0.0608273	0.243309	0.304136	0	0	0.243309	0	0	0	0.243309
				Desulfobulbaceae		4	0				0.428571	0.208551		0	0.0608273	0	0.364964	0.0608273	0.304136	0.729927	0	0	0.6691	0.182482	0	0.0608273	0.486618
			Desulfobacterales			4	0				0.571429	0.265033		0	0.243309	0	0.364964	0.0608273	0.304136	0.851582	0	0	0.790754	0.182482	0	0.182482	0.729927
				Desulfovibrionaceae		5	0				1	1.91171		0.425791	0.790754	1.88564	0.912409	4.0146	2.31144	2.98054	1.27737	1.21655	0.6691	0.486618	3.16302	2.55474	4.07543
			Desulfovibrionales			5	0				1	1.92475		0.425791	0.790754	1.88564	0.912409	4.0146	2.37226	3.04136	1.3382	1.21655	0.6691	0.486618	3.16302	2.55474	4.07543
	Proteobacteria	Deltaproteobacteria	Desulfuromonadales	unclassified	unclassified	1	0				0	0.0043448		0	0.0608273	0	0	0	0	0	0	0	0	0	0	0	0
				unclassified		1	0				0	0.0043448		0	0.0608273	0	0	0	0	0	0	0	0	0	0	0	0
			Desulfuromonadales			1	0					0.0043448		0	0.0608273	0	0	0	0	0	0	0	0	0	0	0	0
	Proteobacteria	Deltaproteobacteria	Myxococcales	Polyangiaceae	unclassified	4	0				0.0714286	0.0173792		0	0	0	0	0	0	0	0	0.243309	0	0	0	0	0
				Polyangiaceae		4	0				0.0714286	0.021724		0	0	0	0	0	0	0	0	0.304136	0	0	0	0	0
	Proteobacteria	Deltaproteobacteria	Myxococcales	Myxococcaceae	unclassified	5	4				0.357143	0.251999		0	0	0	0.425791	0.121655	0	0	1.88564	0.0608273	0.851582	0.121655	0.0608273	0	0
				Myxococcaceae		5	4				0.357143	0.251999		0	0	0	0.425791	0.121655	0	0	1.88564	0.0608273	0.851582	0.121655	0.0608273	0	0
			Myxococcales			9	4				0.5	0.364964		0	0	0	0.547445	0.121655	0.0608273	0.121655	2.25061	0.6691	0.851582	0.364964	0.0608273	0.0608273	0
	Proteobacteria	Deltaproteobacteria	Syntrophobacterales	Syntrophaceae	Syntrophus	–	–				0.142857	0.0477928		0	0	0	0	0.425791	0	0	0	0.0608273	0.0608273	0	0.121655	0	0
	Proteobacteria	Deltaproteobacteria	Syntrophobacterales	Syntrophaceae	unclassified	1	0				0	0.00868961		0	0	0	0	0.0608273	0	0.0608273	0	0	0	0	0	0	0
				Syntrophaceae		1	0				0.142857	0.0564824		0	0	0	0	0.486618	0	0.0608273	0	0.0608273	0.0608273	0	0.121655	0	0
			Syntrophobacterales			1	0				0.142857	0.0564824		0	0	0	0	0.486618	0	0.0608273	0	0.0608273	0.0608273	0	0.121655	0	0
	Proteobacteria	Deltaproteobacteria	unclassified	unclassified	unclassified	1	0				0	0.0130344		0	0	0	0	0	0.0608273	0.0608273	0.0608273	0	0	0	0	0	0
				unclassified		1	0				0	0.0130344		0	0	0	0	0	0.0608273	0.0608273	0.0608273	0	0	0	0	0	0
			unclassified			1	0				0	0.0130344		0	0	0	0	0	0.0608273	0.0608273	0.0608273	0	0	0	0	0	0
		Deltaproteobacteria				24	6		3.13338		1	3.64095		2.85888	1.76399	3.10219	2.91971	5.23114	4.37956	5.29197	3.89294	2.06813	2.61557	1.52068	5.3528	3.46715	6.50852
	Proteobacteria	Gammaproteobacteria	Betaproteobacteriales	Burkholderiaceae	Oxalobacter vibrioformis group	1	1				0.142857	0.0391032		0	0	0	0	0	0	0.121655	0.0608273	0	0	0	0.364964	0	0
	Proteobacteria	Gammaproteobacteria	Betaproteobacteriales	Burkholderiaceae	unclassified	1	0				0.714286	0.469239		0	0	0	1.88564	0	0.121655	0.425791	0.851582	1.82482	0.304136	0.182482	0.486618	0.182482	0.304136
				Burkholderiaceae		2	1				0.785714	0.603928		0	0.0608273	0.121655	2.18978	0	0.182482	0.6691	1.15572	1.82482	0.304136	0.364964	1.03406	0.243309	0.304136
	Proteobacteria	Gammaproteobacteria	Betaproteobacteriales	Rhodocyclaceae	Dechloromonas	4	0				0.142857	0.112965		0	0	0	0	0	0	0	0	0.0608273	0.6691	0	0	0	0.851582
	Proteobacteria	Gammaproteobacteria	Betaproteobacteriales	Rhodocyclaceae	Rs-A34 termite group	8	3				0.5	0.173792		0.243309	0.0608273	0.182482	0.364964	0.121655	0.0608273	0.0608273	0.121655	0.243309	0.912409	0	0	0	0.0608273
	Proteobacteria	Gammaproteobacteria	Betaproteobacteriales	Rhodocyclaceae	unclassified	2	0				0.5	0.421446		0	0.0608273	0	0.182482	0.0608273	0.0608273	0.121655	1.52068	0.0608273	1.76399	0.6691	0.182482	0	1.21655
				Rhodocyclaceae		14	3				1	1.07751		0.304136	0.121655	0.243309	0.608273	1.52068	0.364964	0.182482	1.94647	0.790754	4.0146	0.851582	0.425791	0.182482	3.52798
	Proteobacteria	Gammaproteobacteria	Betaproteobacteriales	SC-I-84	A21b	4	2				0.357143	0.629997		0	0	0	0	0.243309	0.729927	0	0	0	5.47445	0.182482	0	0	2.18978
				SC-I-84		4	2				0.357143	0.629997		0	0	0	0	0.243309	0.729927	0	0	0	5.47445	0.182482	0	0	2.18978
			Betaproteobacteriales			20	6				1	2.40268		0.364964	0.182482	0.364964	3.10219	1.82482	1.27737	0.973236	3.3455	2.73723	9.97567	1.39903	1.58151	0.425791	6.08273
			Enterobacteriales			–	–				0.357143	0.160758		0.0608273	0.121655	0	0.0608273	0.0608273	0.0608273	0	0	0.182482	0.0608273	0	0.121655	0.364964	1.15572
			Pseudomonadales			–	–				0.5	0.156413		0	0.121655	0	0.121655	0	0	0	0	0	0.182482	0.729927	0.182482	0.608273	0.243309
			Legionellales			–	–				0.142857	0.130344		0	0	0	0.0608273	0.0608273	1.39903	0.182482	0	0	0.0608273	0	0.0608273	0	0
		Gammaproteobacteria				20	6		4.74201		1	2.81978		0.486618	0.547445	0.364964	3.46715	2.0073	2.85888	1.3382	3.46715	3.04136	10.4623	2.25061	0.486618	0.973236	7.72506
	Proteobacteria					67	23		9.82215		1	7.83803		3.89294	3.22384	3.46715	8.15085	7.90754	7.96837	7.54258	7.66423	7.90754	13.8078	6.44769	9.18491	5.59611	16.9708
	Saccharibacteria	Saccharimonadia	Saccharimonadales	Saccharimonadaceae	M1NP1-63 group	8	6				0.928571	1.4642		0.182482	0.182482	0.121655	0.729927	1.82482	0.425791	1.21655	0.364964	0	0.304136	0.547445	1.09489	3.40633	10.0973
				Saccharimonadaceae		8	6				0.928571	1.4642		0.182482	0.182482	0.121655	0.729927	1.82482	0.425791	1.21655	0.364964	0	0.304136	0.547445	1.09489	3.40633	10.0973
	Saccharibacteria	Saccharimonadia	Saccharimonadales	Incertae sedis	Rs-045 group	7	6				0.928571	0.695169		0.0608273	0.486618	0.304136	1.39903	1.82482	3.10219	0.425791	0.182482	0.182482	0.243309	0.6691	0.121655	0.364964	0.364964
				Incertae sedis		7	6				0.928571	0.695169		0.0608273	0.486618	0.304136	1.39903	1.82482	3.10219	0.425791	0.182482	0.182482	0.243309	0.6691	0.121655	0.364964	0.364964
			Saccharimonadales			15	12				1	2.22019		0.243309	0.6691	0.425791	2.12895	4.07543	3.58881	1.70316	0.547445	0.486618	0.547445	1.21655	1.21655	3.77129	10.4623
		Saccharimonadia				15	12		0.14509		1	2.22019		0.243309	0.6691	0.425791	2.12895	4.07543	3.58881	1.70316	0.547445	0.486618	0.547445	1.21655	1.21655	3.77129	10.4623
	Saccharibacteria					15	12		0.14509		1	2.22019		0.243309	0.6691	0.425791	2.12895	4.07543	3.58881	1.70316	0.547445	0.486618	0.547445	1.21655	1.21655	3.77129	10.4623
	Spirochaetes	Spirochaetes	Spirochaetales	Leptospiraceae	Rs-H88 termite group	5	1				0.428571	0.11731		0.0608273	0.121655	0	0.0608273	0.0608273	0.425791	0.121655	0.304136	0	0.304136	0.121655	0	0.0608273	0
				Leptospiraceae		5	1				0.428571	0.130344		0.0608273	0.121655	0	0.0608273	0.0608273	0.425791	0.304136	0.304136	0	0.304136	0.121655	0	0.0608273	0
			Leptospirales			5	1				0.428571	0.130344		0.0608273	0.121655	0	0.0608273	0.0608273	0.425791	0.304136	0.304136	0	0.304136	0.121655	0	0.0608273	0
		Leptospirae				5	1		0.173928		0.428571	0.130344		0.0608273	0.121655	0	0.0608273	0.0608273	0.425791	0.304136	0.304136	0	0.304136	0.121655	0	0.0608273	0
	Spirochaetes	Spirochaetia	Spirochaetales	Spirochaetaceae_Treponema_I	Treponema I termite group	56	8				1	23.2795		65.8759	66.7883	51.2774	27.3723	24.0876	23.1752	12.4088	23.9659	8.21168	9.48905	4.50122	7.29927	1.27737	0.182482
	Spirochaetes	Spirochaetia	Spirochaetales	Spirochaetaceae_3	Candidatus Spironema	1	1				0.428571	0.191171		0.182482	0	0.486618	0.425791	0.547445	0.790754	0.0608273	0.121655	0	0	0	0.0608273	0	0
	Spirochaetes	Spirochaetia	Spirochaetales	Spirochaetaceae	M2PT2-76 termite group	4	0				0.714286	0.221585		0.243309	0	0.243309	0.243309	0.304136	0.121655	0	0.425791	0.121655	0.973236	0.182482	0.0608273	0.121655	0.0608273
	Spirochaetes	Spirochaetes	Spirochaetales	Spirochaetaceae_3	unclassified	1	0				0.428571	0.191171		0.182482	0	0.486618	0.425791	0.547445	0.790754	0.0608273	0.121655	0	0	0	0.0608273	0	0
				Spirochaetaceae		62	9				1	23.8182		66.3017	67.3966	52.0073	28.0414	24.9392	24.0876	12.4696	24.5134	8.33333	10.5231	4.6837	8.09002	1.82482	0.243309
			Spirochaetales			63	9				1	23.9095	0	66.3017	67.3966	52.0681	28.0414	25.2433	24.0876	12.4696	24.5742	8.33333	10.5839	4.6837	8.6983	1.88564	0.364964
	Spirochaetes	Spirochaetia	unclassified			1	0				0.571429	0.425791		0.243309	0.121655	0	1.39903	0.121655	0.0608273	0.182482	0.547445	0.0608273	0.0608273	0.0608273	2.79805	0.0608273	0.243309
		Spirochaetia				63	9		2.82022		1	24.3657		66.545	67.5182	52.0681	29.5012	25.365	24.1484	12.7129	25.4258	8.39416	10.6448	4.74453	11.4964	1.94647	0.608273
	Spirochaetes					68	10		2.99415		1	24.496		66.6058	67.6399	52.0681	29.562	25.4258	24.5742	13.017	25.7299	8.39416	10.9489	4.86618	11.4964	2.0073	0.608273
	Synergistetes	Synergistia	Synergistales	Synergistaceae	Candidatus Tammella	1	1				0.285714	0.147723		0	0.121655	0	0	0	0	0	0	0	0.182482	0	0.851582	0.851582	0.0608273
	Synergistetes	Synergistia	Synergistales	Synergistaceae	BCf4-02 termite group	5	0				0.928571	1.35558		0.486618	0.912409	0.912409	0.304136	0.729927	0.790754	1.27737	1.58151	5.71776	2.37226	1.03406	2.37226	0.425791	0.0608273
				Synergistaceae		6	1				1	1.51634		0.486618	1.03406	0.912409	0.304136	0.729927	0.790754	1.27737	1.58151	5.71776	2.73723	1.03406	3.22384	1.27737	0.121655
			Synergistales			6	1				1	1.51634		0.486618	1.03406	0.912409	0.304136	0.729927	0.790754	1.27737	1.58151	5.71776	2.73723	1.03406	3.22384	1.27737	0.121655
		Synergistia				6	1		0.281343		1	1.51634		0.486618	1.03406	0.912409	0.304136	0.729927	0.790754	1.27737	1.58151	5.71776	2.73723	1.03406	3.22384	1.27737	0.121655
	Synergistetes					6	1		0.281343		1	1.51634		0.486618	1.03406	0.912409	0.304136	0.729927	0.790754	1.27737	1.58151	5.71776	2.73723	1.03406	3.22384	1.27737	0.121655
		Opitutae				–	–				0.571429	0.208551		0.0608273	0.182482	0	0.364964	0	0	0.121655	0	0.243309	0.121655	0.182482	1.45985	0.182482	0
			Chthoniobacterales			–	–				0.428571	0.134689		0	0	0	0	0.121655	0.304136	0.0608273	0.0608273	0.425791	0.425791	0.364964	0	0	0.121655
		Verrucomicrobiae				–	–				0.428571	0.134689		0	0	0	0	0.121655	0.304136	0.0608273	0.0608273	0.425791	0.425791	0.364964	0	0	0.121655
	Verrucomicrobia					–	–				0.785714	0.377998		0.0608273	0.243309	0	0.425791	0.121655	0.304136	0.182482	0.0608273	0.790754	0.608273	0.547445	1.45985	0.304136	0.182482
Bacteria						551	170		36.7013			100		100	100	100	100	100	100	100	100	100	100	100	100	100	100
	Crenarchaeota	Bathyarchaeia	incertae sedis	Termite group	unclassified	15	10
				Termite group		15	10
			incertae sedis			15	10
		Bathyarchaeia				15	10		1.18503
	Bathyarchaeota					15	10		1.18503
	Euryarchaeota	Methanobacteria	Methanobacteriales	Methanobacteriaceae	Methanobrevibacter	3	0
				Methanobacteriaceae		3	0
			Methanobacteriales			3	0
		Methanobacteria				3	0		0.12985
	Euryarchaeota	Methanomicrobia	Methanosarcinales	Methanosarcinaceae	Methanimicrococcus	3	0
				Methanosarcinaceae		3	0
			Methanosarcinales			3	0
		Methanomicrobia				3	0		0.0840753
	Euryarchaeota	Thermoplasmata	Methanomassiliicoccales	Methanomethylophilaceae	Candidatus Methanoplasma	9	2
					unclassified	7	4
				Methanomethylophilaceae		16	6
			Methanomassiliicoccales			16	6
		Thermoplasmata				16	6		0.280604
	Euryarchaeota	unclassified				1	0		0.0363784
	Euryarchaeota					23	6		0.530908
Archaea						38	16		1.71593
Total						589	187		38.4173

## Sheet: Host species
	ID	Host species	Diet	Data source
	Mc	Microcerotermes sp.	Wood	Dietrich et al. (2014)
	Nc	Nasutitermes corniger	Wood	Dietrich et al. (2014)
	Trx	Trinervitermes sp.	Grass	Dietrich et al. (2014)
	Co	Cornitermes sp.	Litter	Mikaelyan et al. (2015a)
	Vex	Velocitermes sp.	Litter	Mikaelyan et al. (2015a)
	Atx	Atlantitermes sp.	Humus	Mikaelyan et al. (2015a)
	Nt	Neocapritermes taracua	Humus	Mikaelyan et al. (2015a)
	Th	Termes hospes	Humus	Mikaelyan et al. (2015a)
	Alt	Alyscotermes trestus	Soil	Dietrich et al. (2014)
	Cu	Cubitermes ugandensis	Soil	Dietrich et al. (2014)
	Opx	Ophiotermes sp.	Soil	Dietrich et al. (2014)
	Odx	Odontotermes sp.	Fungus	Dietrich et al. (2014)
	Max	Macrotermes sp.	Fungus	Dietrich et al. (2014)
	Mas	Macrotermes subhyalinus	Fungus	Dietrich et al. (2014)
